# Supplementary material for: Resonance Analysis as a Tool for Characterizing Functional Division of Layer 5 Pyramidal Neurons
Source: Front Comput Neurosci. 2018 May 3;12:29. doi: 10.3389/fncom.2018.00029 (PMC5945999; doi:10.3389/fncom.2018.00029)
Supplement: Supplementary file 2 [file Data_Sheet_2.XLSX]

## Sheet: Sheet1
DC Offsets for Input Resonance Analysis			DC Offsets for Transfer Resonance Analysis (transfer compartment hyperpolarized)					DC Offsets for Transfer Resonance Analysis (transfer compartment near local resting membrane potential)					DC Offsets for Transfer Resonance Analysis (transfer compartment depolarized)					DC Offsets for Transfer Resonance Analysis (transfer compartment depolarized)
soma			soma					soma					soma					soma
membrane potential (mV)	DC offset (pA)		membrane potential (mV)	DC offset (pA)	dist ap dend at -75mV	DC offset (pA)		membrane potential (mV)	DC offset (pA)	dist ap dend at -60mV	DC offset (pA)		membrane potential (mV)	DC offset (pA)	dist ap dend at -30mV	DC offset (pA)		membrane potential (mV)	DC offset (pA)	dist ap dend at 0mV	DC offset (pA)
-80	-1035		-80.7	-1035		-2930		-80	-1035		-125		-77.8	-1035		2500		-76.1	-1035		6700
-75	-650
-70	-280		-71	-280		-2960		-70.2	-280		-165		-67.7	-280		2450		-66.3	-280		6650
-65	118
-60	575		-60.9	575		-3000		-60.2	575		-220		-58.7	575		2400		-58	575		6575
-55	1220
-50	2200		-50.3	2200		-3050		-50	2200		-290		-49.6	2200		2375		-49.4	2200		6560
-45	3760
-40	6270		-40	6270		-3080		-40	6270		-325		-39.9	6270		2360		-39.8	6270		6550
-35	10250
-30	16200		-30	16200		-3100		-30	16200		-340		-30	16200		2350		-30	16200		6540
dist ap dend			dist ap dend					dist ap dend					dist ap dend
membrane potential (mV)	DC offset (pA)		membrane potential (mV)	DC offset (pA)	soma at -80mV	DC offset (pA)		membrane potential (mV)	DC offset (pA)	soma at -65mV	DC offset (pA)		membrane potential (mV)	DC offset (pA)	soma at -50mV	DC offset (pA)
-80	-4470		-80.3	-4470		-965		-80.1	-4470		215		-80	-4470		2300
-75	-3050
-70	-1785		-70.4	-1785		-995		-70.2	-1785		185		-69.8	-1785		2250
-65	-885
-60	-230		-61	-230		-1025		-60.3	-230		132		-59.4	-230		2225
-55	210
-50	545		-51.7	545		-1070		-50.2	545		70		-48.7	545		2170
-45	870
-40	1270		-41	1270		-1135		-40.1	1270		0		-39.6	1270		2120
-35	1770
-30	2390		-31	2390		-1200		-30.3	2390		-60		-29.9	2390		2080
-25	3035
-20	3700		-21.5	3700		-1245		-21	3700		-100		-20.7	3700		2060
-15	4330
-10	4975		-12.4	4975		-1285		-12	4975		-135		-11.7	4975		2050
-5	5600
0	6230		3.1	6230		-1315		2.7	6230		-165		2.5	6230		2040
ap tuft			ap tuft					ap tuft					ap tuft
membrane potential (mV)	DC offset (pA)		membrane potential (mV)	DC offset (pA)	soma at -80mV	DC offset (pA)		membrane potential (mV)	DC offset (pA)	soma at -65mV	DC offset (pA)		membrane potential (mV)	DC offset (pA)	soma at -50mV	DC offset (pA)
-80	-1075		-80.1	-1075		-1030		-80	-1075		130		-79.88	-1075		2215
-75	-740
-70	-450		-70.17	-450		-1035		-70	-450		125		-69.79	-450		2200
-65	-232
-60	-80		-60.4	-80		-1040		-60	-80		120		-59.5	-80		2195
-55	35
-50	133		-50.67	133		-1045		-49.93	133		110		-49.12	133		2190
-45	230
-40	335		-40.63	335		-1050		-39.92	335		96		-39.17	335		2185
-35	455
-30	590		-30.57	590		-1060		-29.93	590		80		-29.27	590		2180
-25	725
-20	852		-20.75	852		-1070		-20.04	852		68		-19.34	852		2172
-15	980
-10	1110		-10.6	1110		-1085		-10	1110		55		-9.39	1110		2160
-5	1240
0	1380		-0.26	1380		-1095		0.37	1380		40		0.9	1380		2152
bas dend			bas dend					bas dend					bas dend
membrane potential (mV)	DC offset (pA)		membrane potential (mV)	DC offset (pA)	soma at -80mV	DC offset (pA)		membrane potential (mV)	DC offset (pA)	soma at -65mV	DC offset (pA)		membrane potential (mV)	DC offset (pA)	soma at -50mV	DC offset (pA)
-80	-42		-91.2	-42		-995		-78.5	-42		150		-68.1	-42		2225
-75	-26
-70	-8		-80.7	-8		-1025		-68.8	-8		125		-61.2	-8		2200
-65	11
-60	34		-68.6	34		-1065		-59.6	34		100		-55.3	34		2182
-55	68
-50	126		-52.6	126		-1100		-49.9	126		80		-48.4	126		2170
-45	230
-40	420		-40.6	420		-1130		-39.9	420		60		-39.6	420		2160
-35	706
-30	1070		-30.3	1070		-1150		-30	1070		50		-29.8	1070		2155
mid ap dend			mid ap dend					mid ap dend					mid ap dend
membrane potential (mV)	DC offset (pA)		membrane potential (mV)	DC offset (pA)	soma at -80mV	DC offset (pA)		membrane potential (mV)	DC offset (pA)	soma at -65mV	DC offset (pA)		membrane potential (mV)	DC offset (pA)	soma at -50mV	DC offset (pA)
-80	-2250		-81.25	-2250		-435		-77.58	-2260		835		-73.58	-2260		2840
-75	-1470
-70	-780		-73.01	-780		-805		-68.45	-780		398		-63.42	-780		2430
-65	-190
-60	315		-65.75	315		-1144		-60.1	315		-10		-55.1	315		2100
-55	845
-50	1480		-56.67	1480		-1588		-51.2	1480		-430		-47.75	1480		1880
-45	2336
-40	3560		-43.56	3560		-2228		-40.83	3560		-875		-39.21	3560		1655
-35	5165
-30	7100		-31.9	7100		-2740		-30.53	7100		-1228		-29.67	7100		1475
-25	9150
-20	11200		-21.56	11200		-3112		-20.5	11200		-1495		-19.83	11200		1300
-15	13200
-10	15185		-11.31	15185		-3412		-10.4	15185		-1705		-9.82	15185		1180
-5	17075
0	18925		-1.23	18925		-3665		-0.4	18925		-1885		0.17	18925		1075
soma (no hot zone)								soma (no hot zone)
membrane potential (mV)	DC offset (pA)							membrane potential (mV)	DC offset (pA)	dist ap dend at -60mV	DC offset (pA)
-80	-1035							-80	-1035		-125
-75	-650
-70	-280							-70.2	-280		-165
-65	118
-60	575							-60.2	575		-220
-55	1220
-50	2200							-50	2200		-290
-45	3760
-40	6270							-40	6270		-325
-35	10250
-30	16200							-30	16200		-340
dist ap dend (no hot zone)								dist ap dend (no hot zone)
membrane potential (mV)	DC offset (pA)							membrane potential (mV)	DC offset (pA)	soma at -65mV	DC offset (pA)
-80	-4450							-80.1	-4450		215
-75	-2980
-70	-1730							-70.2	-1730		185
-65	-815
-60	-190							-60.3	-190		132
-55	238
-50	560							-50.2	560		70
-45	880
-40	1280							-40.1	1280		0
-35	1800
-30	2430							-30.3	2430		-60
-25	3130
-20	3840							-21	3840		-100
-15	4550
-10	5245							-12	5245		-135
-5	5930
0	6580							2.7	6580		-165
ap tuft (no hot zone)								ap tuft (no hot zone)
membrane potential (mV)	DC offset (pA)							membrane potential (mV)	DC offset (pA)	soma at -65mV	DC offset (pA)
-80.16	-1075							-80.15	-1075		130
-75.18	-740
-70.28	-450							-70.64	-450		125
-65.33	-232
-60.45	-80							-60.4	-80		120
-55.48	35
-50.4	133							-50.33	133		110
-45.27	230
-40.28	335							-40.22	335		96
-35.35	455
-30.4	590							-30.36	590		80
-25.67	725
-21.2	852							-21.16	852		68
-16.58	980
-11.8	1110							-11.78	1110		55
-6.94	1240
-1.6	1380							-1.57	1380		40
mid ap dend (no hot zone)								mid ap dend (no hot zone)
membrane potential (mV)	DC offset (pA)							membrane potential (mV)	DC offset (pA)	soma at -65mV	DC offset (pA)
-80	-2250							-77.54	-2250		835
-75	-1470
-70.13	-780							-68.52	-780		398
-65	-190
-60.12	315							-60.16	315		-10
-55	845
-50	1480							-51.26	1480		-430
-45.11	2336
-40	3560							-40.85	3560		-875
-35	5165
-30	7100							-30.53	7100		-1228
-25	9150
-20	11200							-20.5	11200		-1495
-15	13200
-10	15185							-10.42	15185		-1705
-5	17075
0	18925							-0.4	18925		-1885
bas dend (no hot zone)								bas dend (no hot zone)
membrane potential (mV)	DC offset (pA)							membrane potential (mV)	DC offset (pA)	soma at -65mV	DC offset (pA)
-80	-42							-78.48	-42		150
-75.16	-26
-70	-8							-68.83	-8		125
-65	11
-60.1	34							-59.57	34		100
-55.8	68
-50	126							-49.88	126		80
-45	230
-40	420							-39.92	420		60
-35	706
-30	1070							-30	1070		50
